# Supplementary material
Source: PubMed Central journal article supplement (PMC8171494)

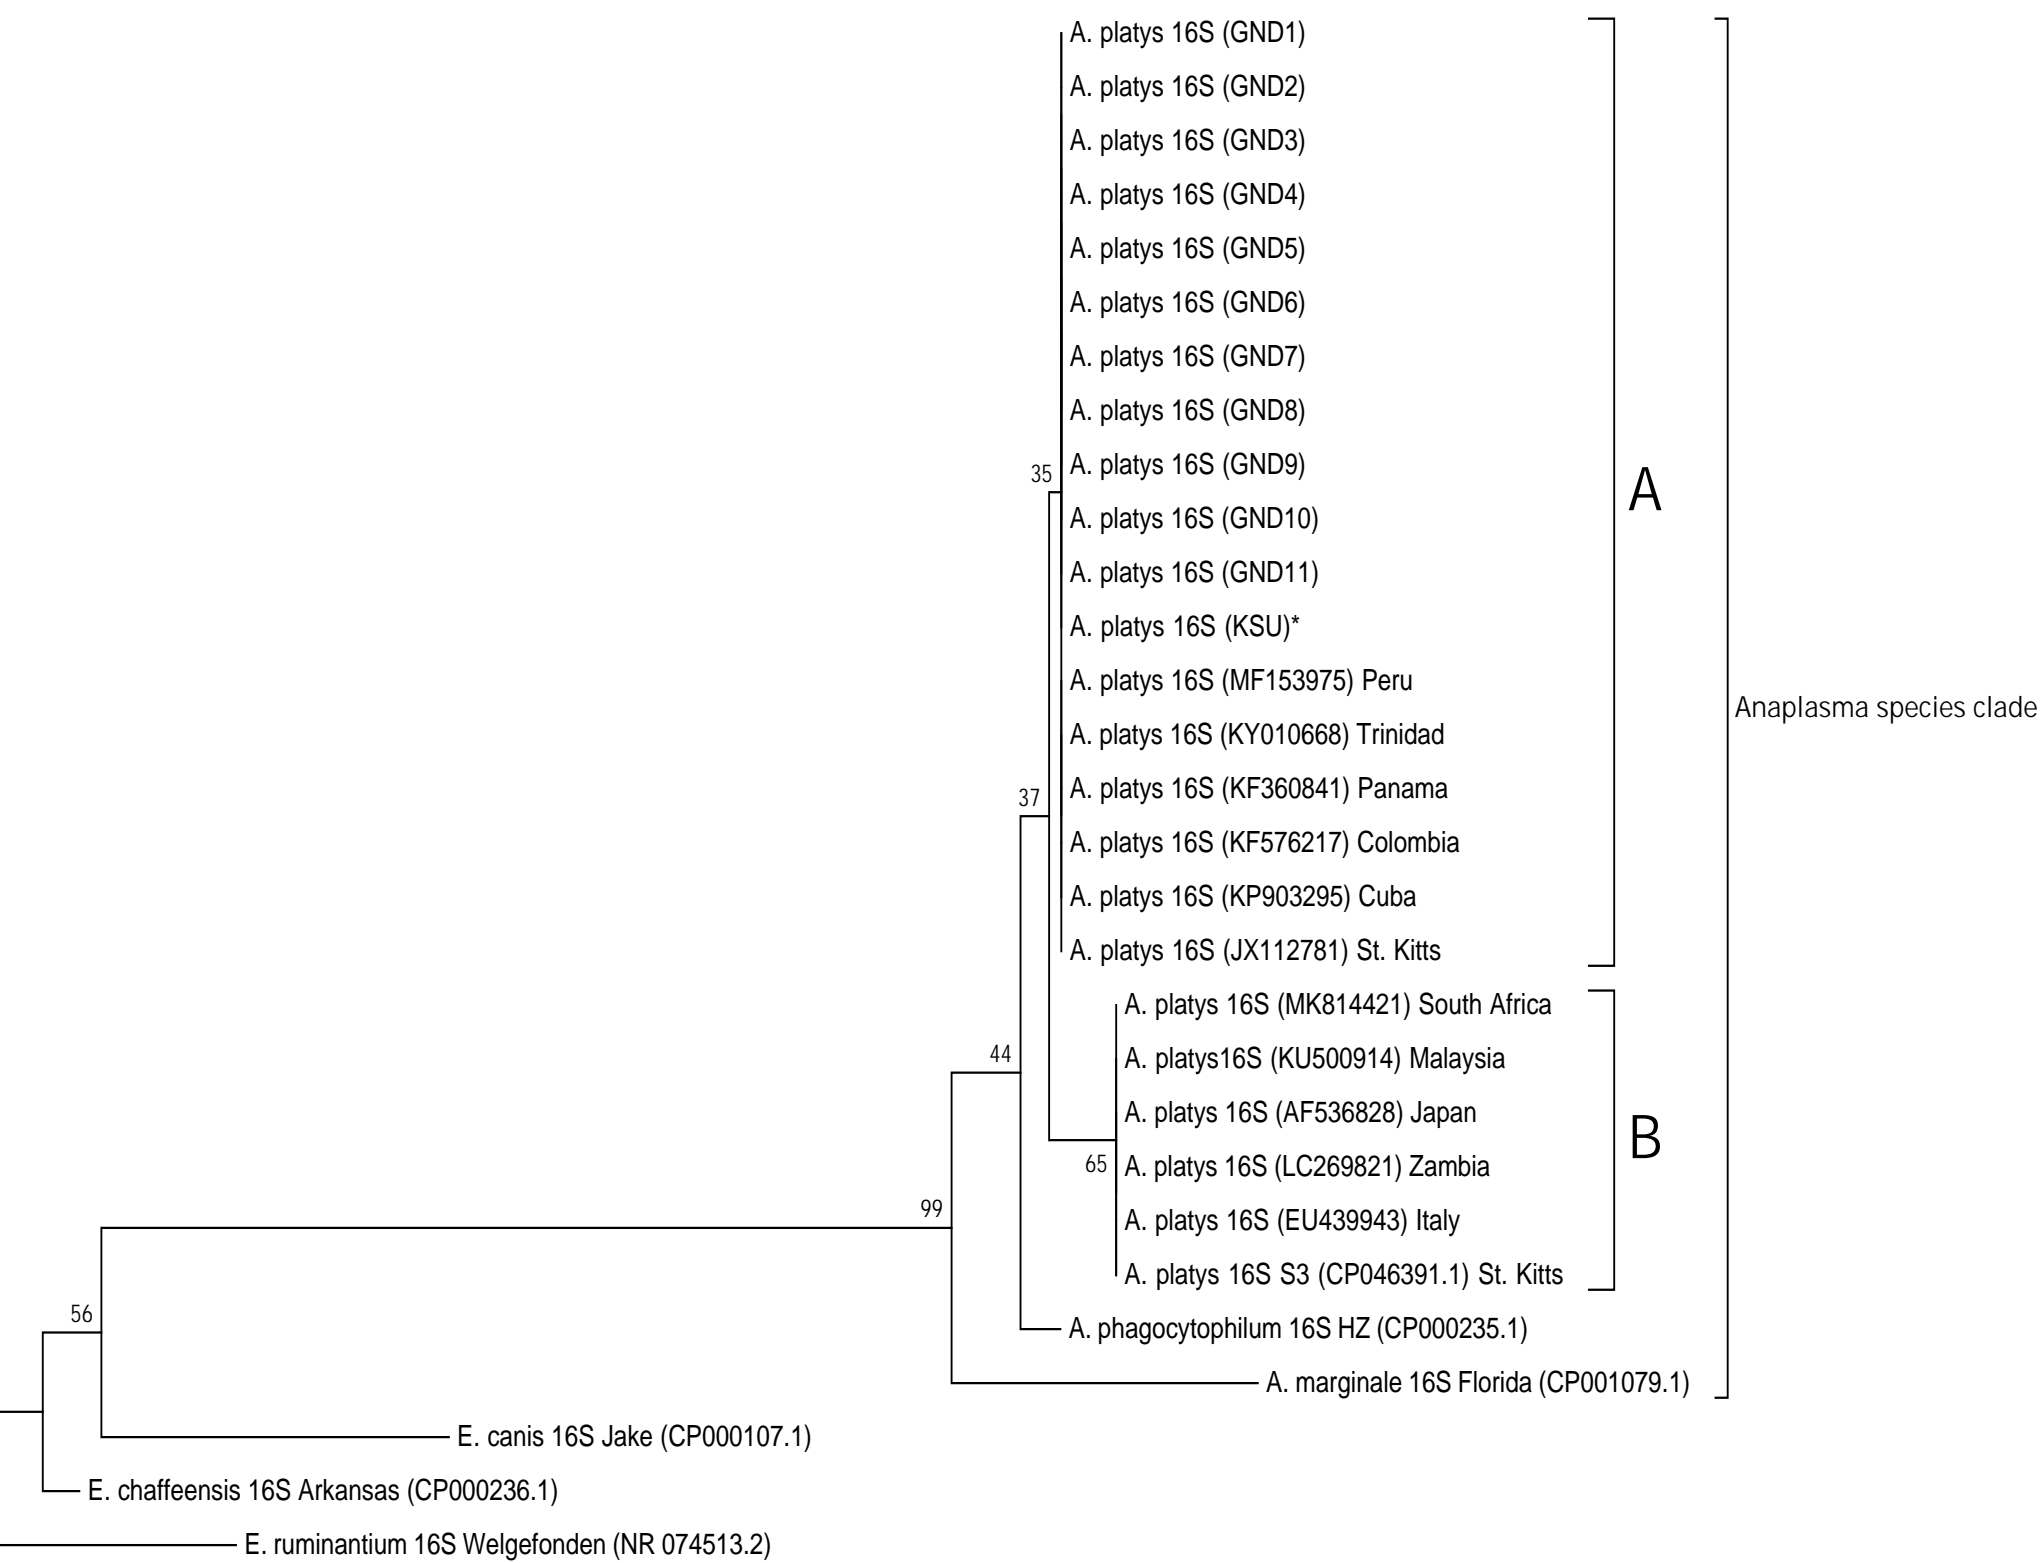

0.01

Supplement: NIHMS1704376-supplement-Suppl__Fig_1b_-_A__platys_16S_UPGMA_Tree.pdf [file NIHMS1704376-supplement-Suppl__Fig_1b_-_A__platys_16S_UPGMA_Tree.pdf]

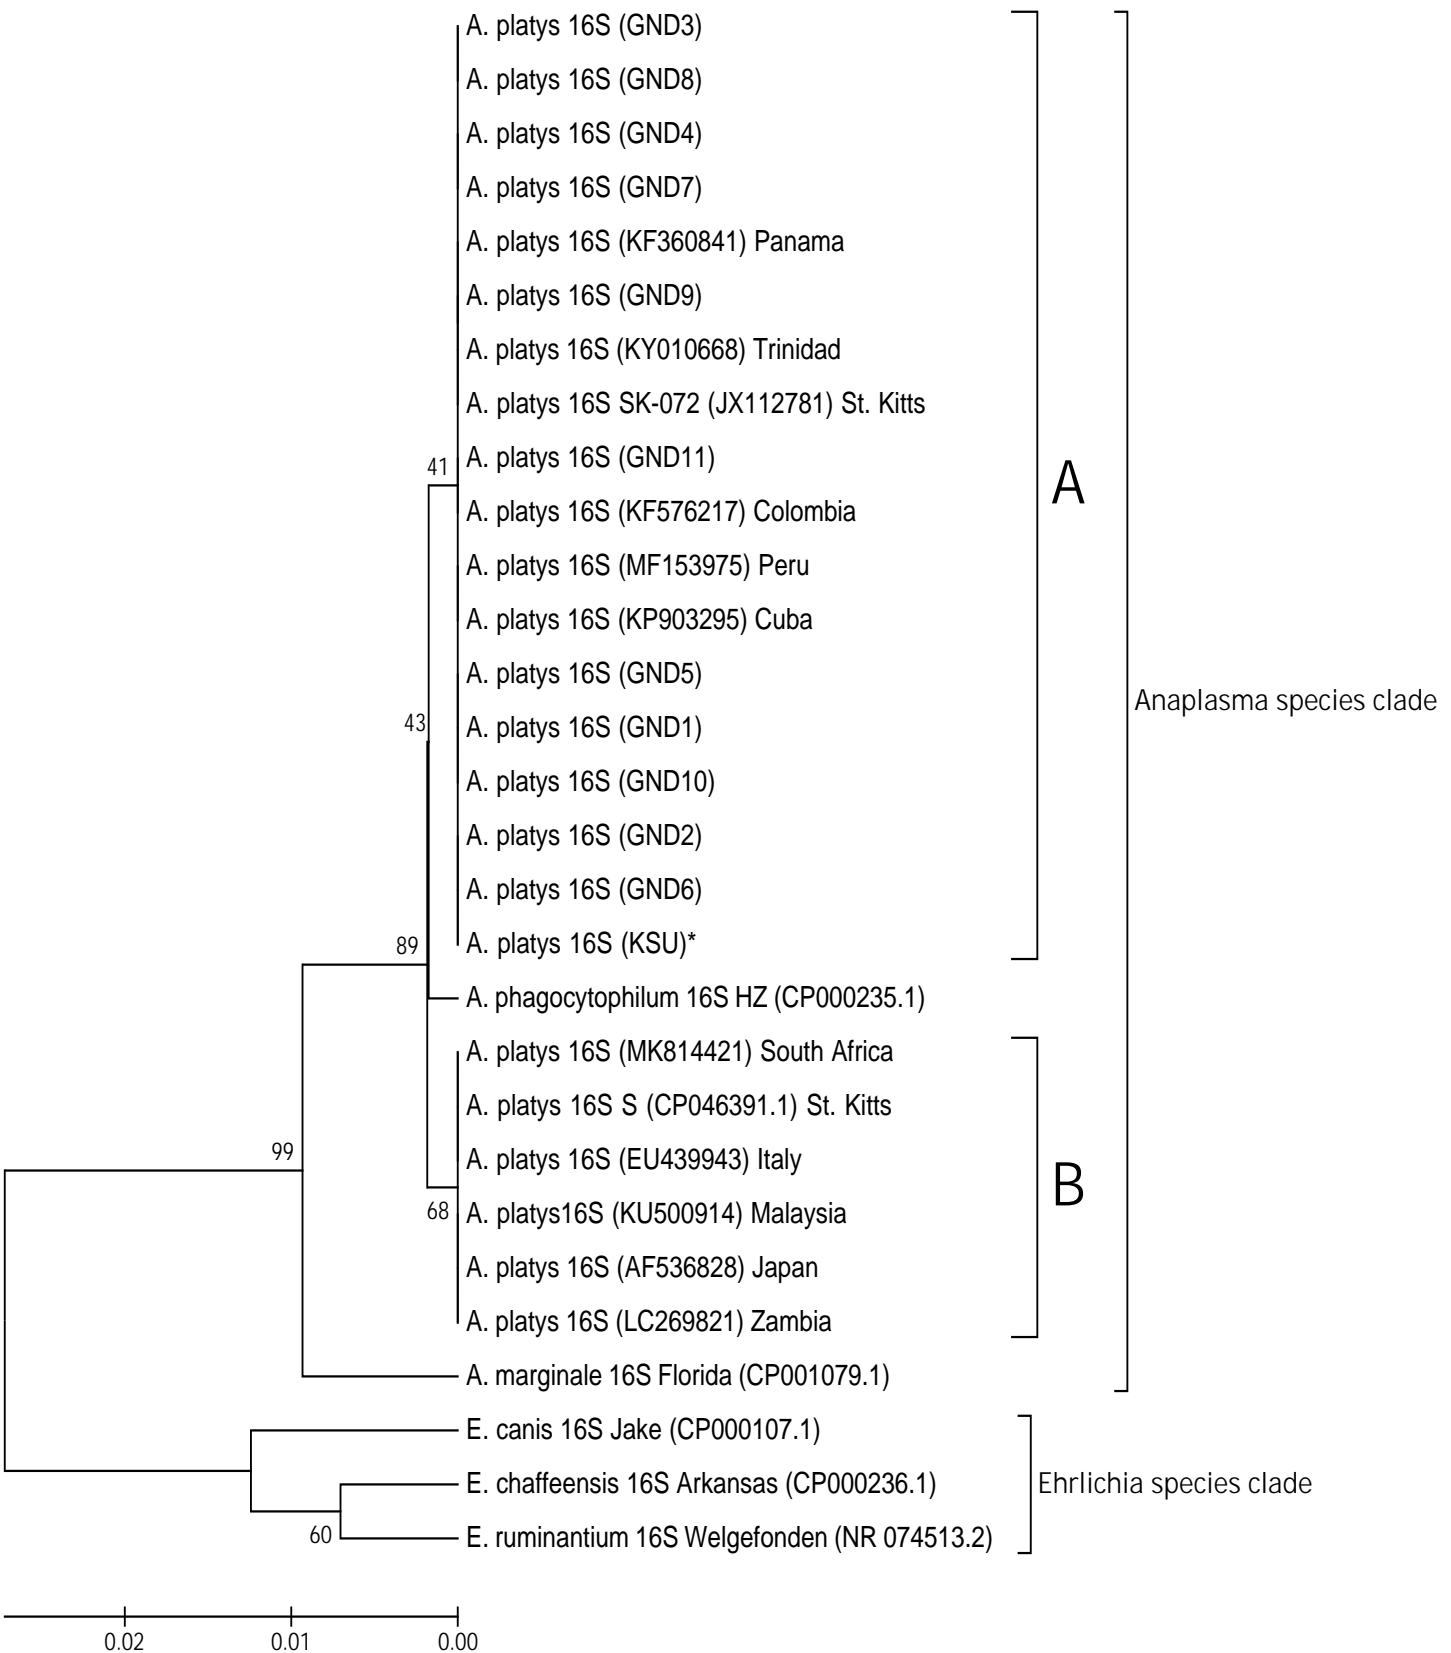

Supplement: NIHMS1704376-supplement-Suppl__Fig_2a_-_A__platys_23S_NJ_Tree.pdf [file NIHMS1704376-supplement-Suppl__Fig_2a_-_A__platys_23S_NJ_Tree.pdf]

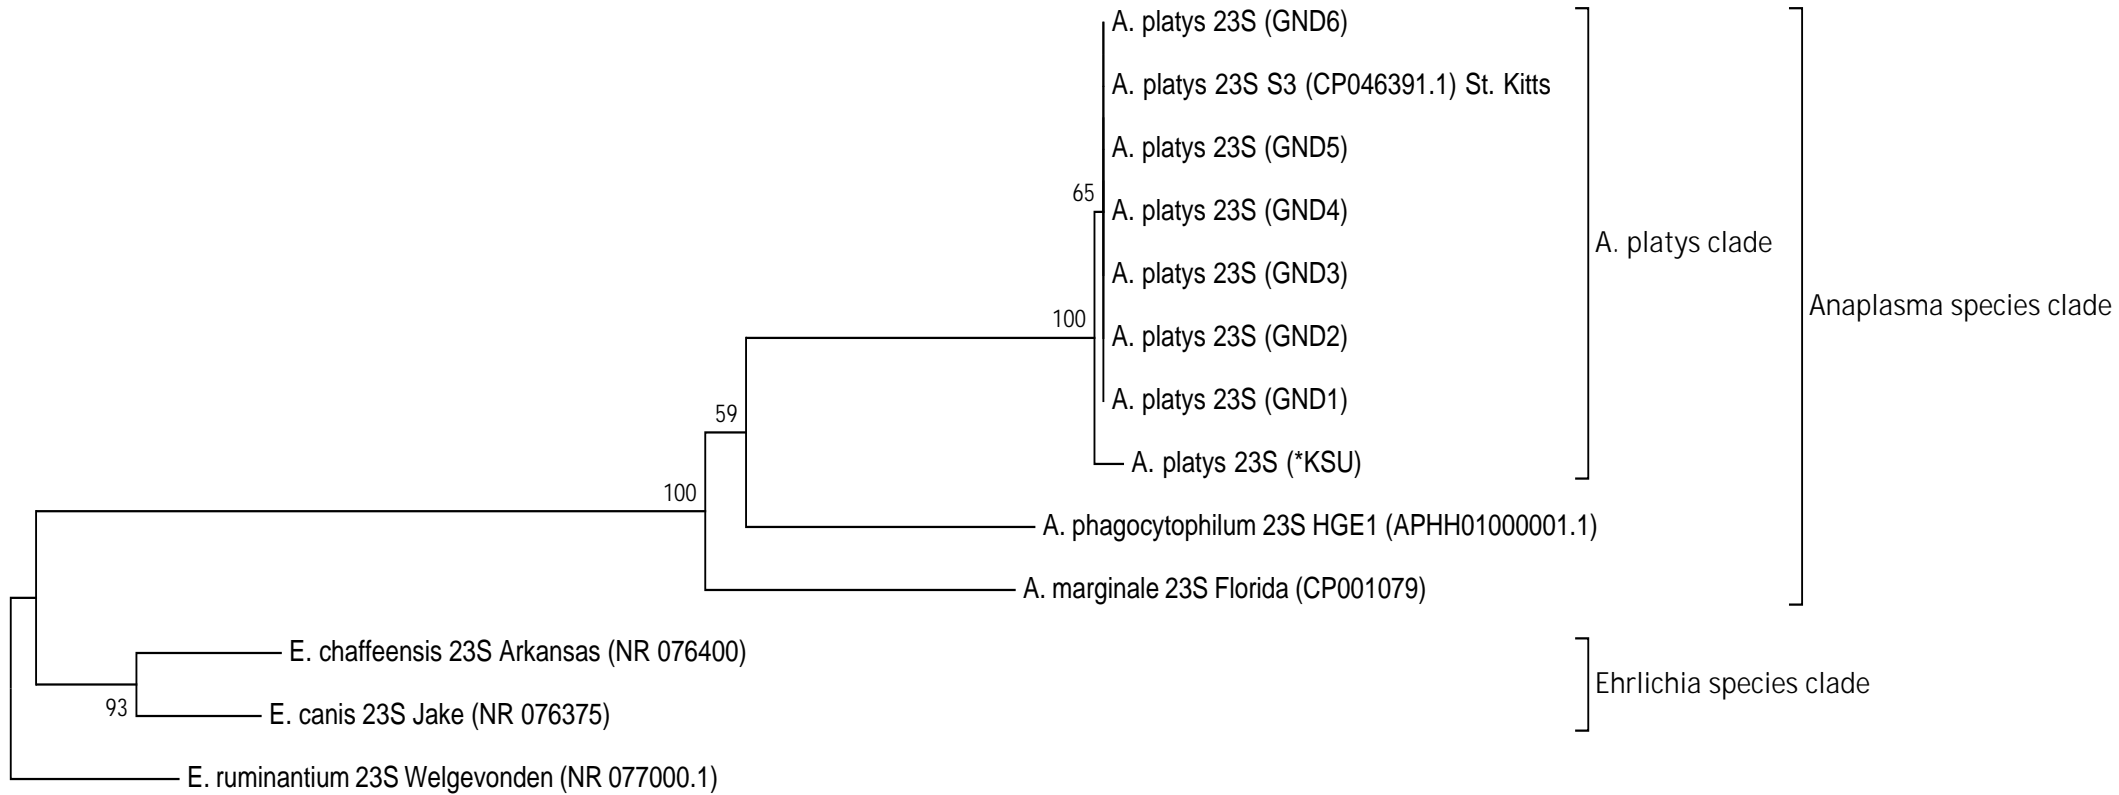

0.01

Supplement: NIHMS1704376-supplement-Suppl__Fig_2b_-_A__platys_23S_UPGMA_Tree.pdf [file NIHMS1704376-supplement-Suppl__Fig_2b_-_A__platys_23S_UPGMA_Tree.pdf]

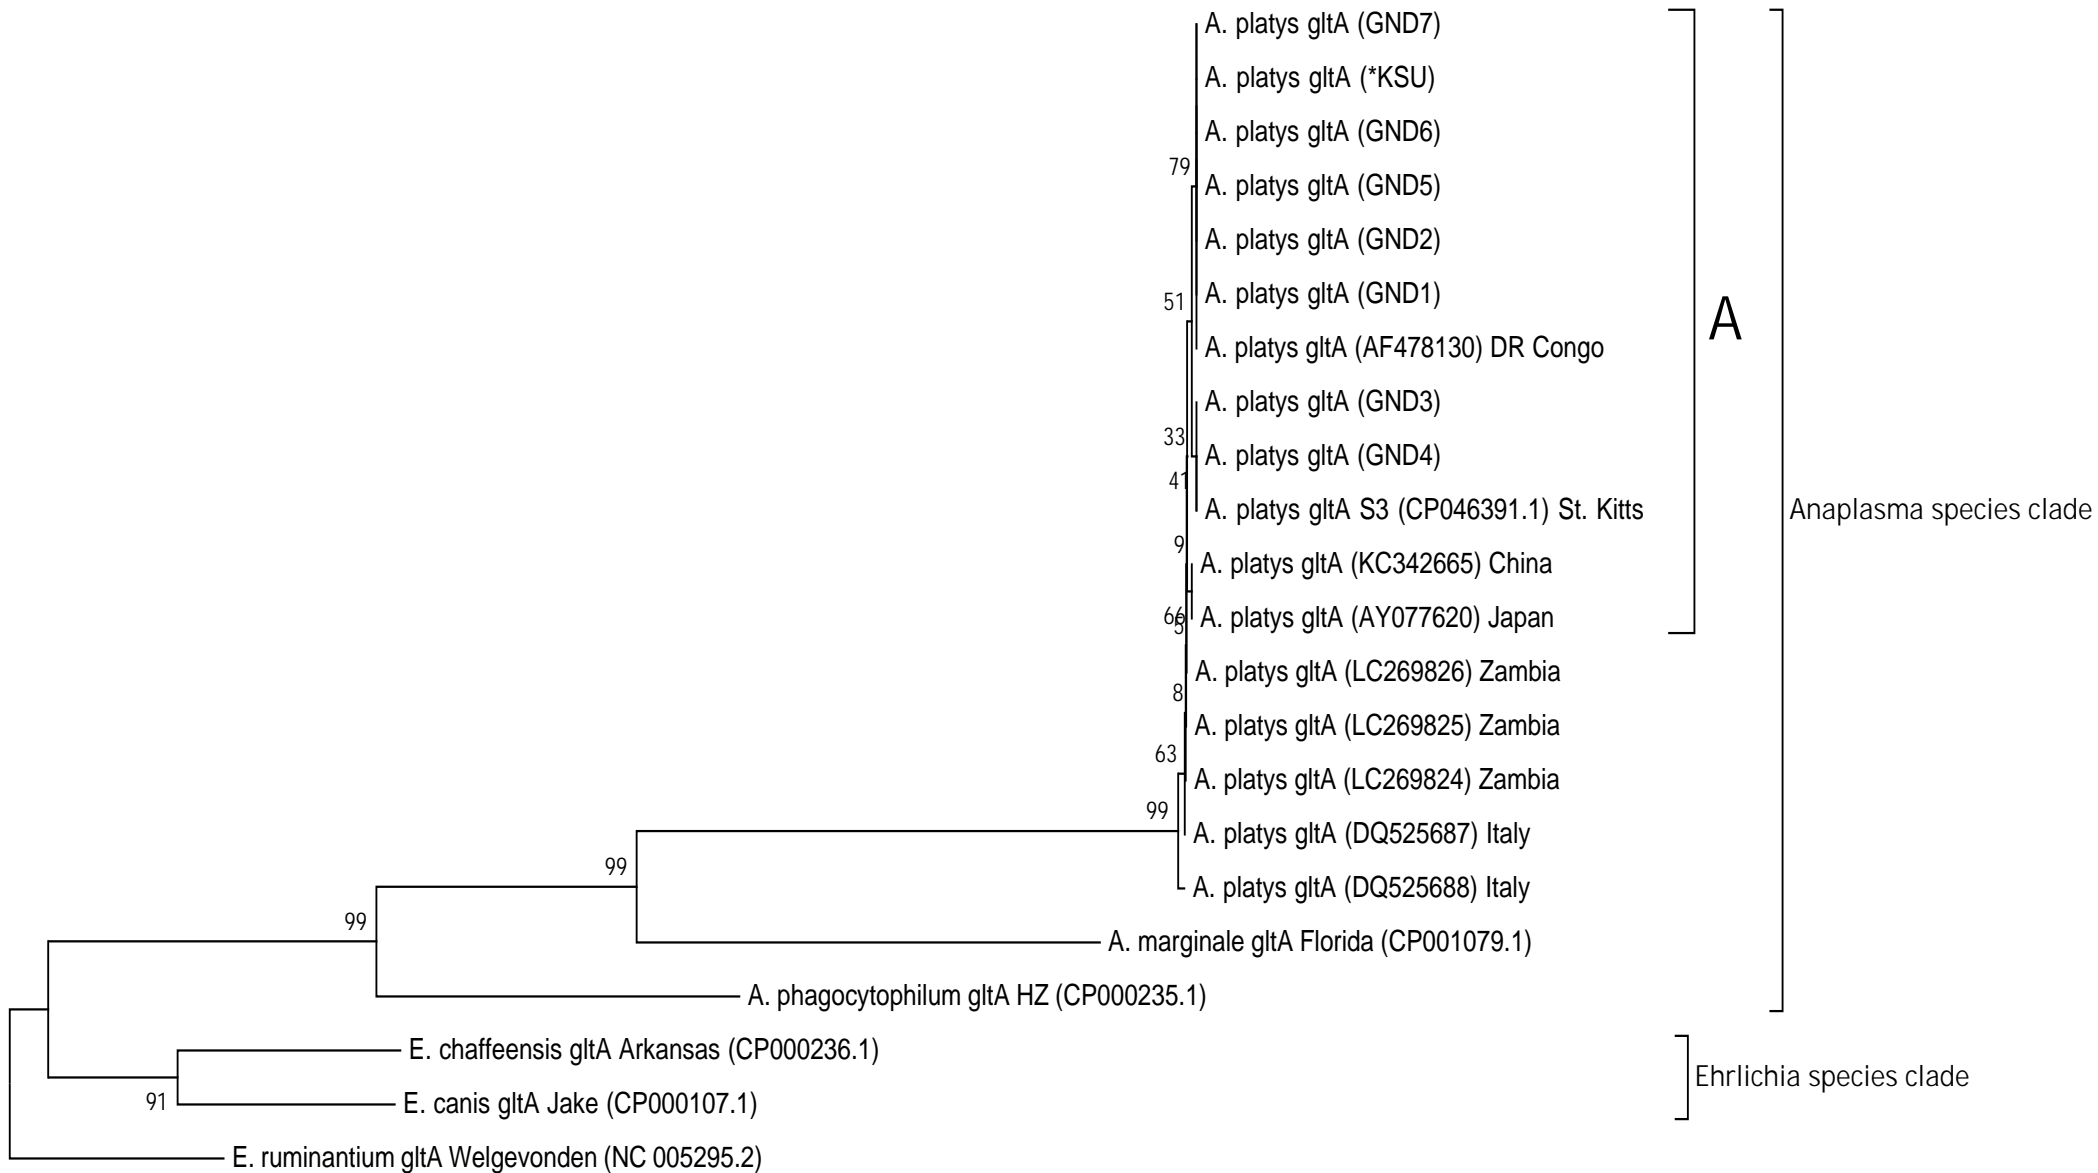

Supplement: NIHMS1704376-supplement-Suppl__Fig_3a_-_A__platys_gltA_NJ_Tree.pdf [file NIHMS1704376-supplement-Suppl__Fig_3a_-_A__platys_gltA_NJ_Tree.pdf]

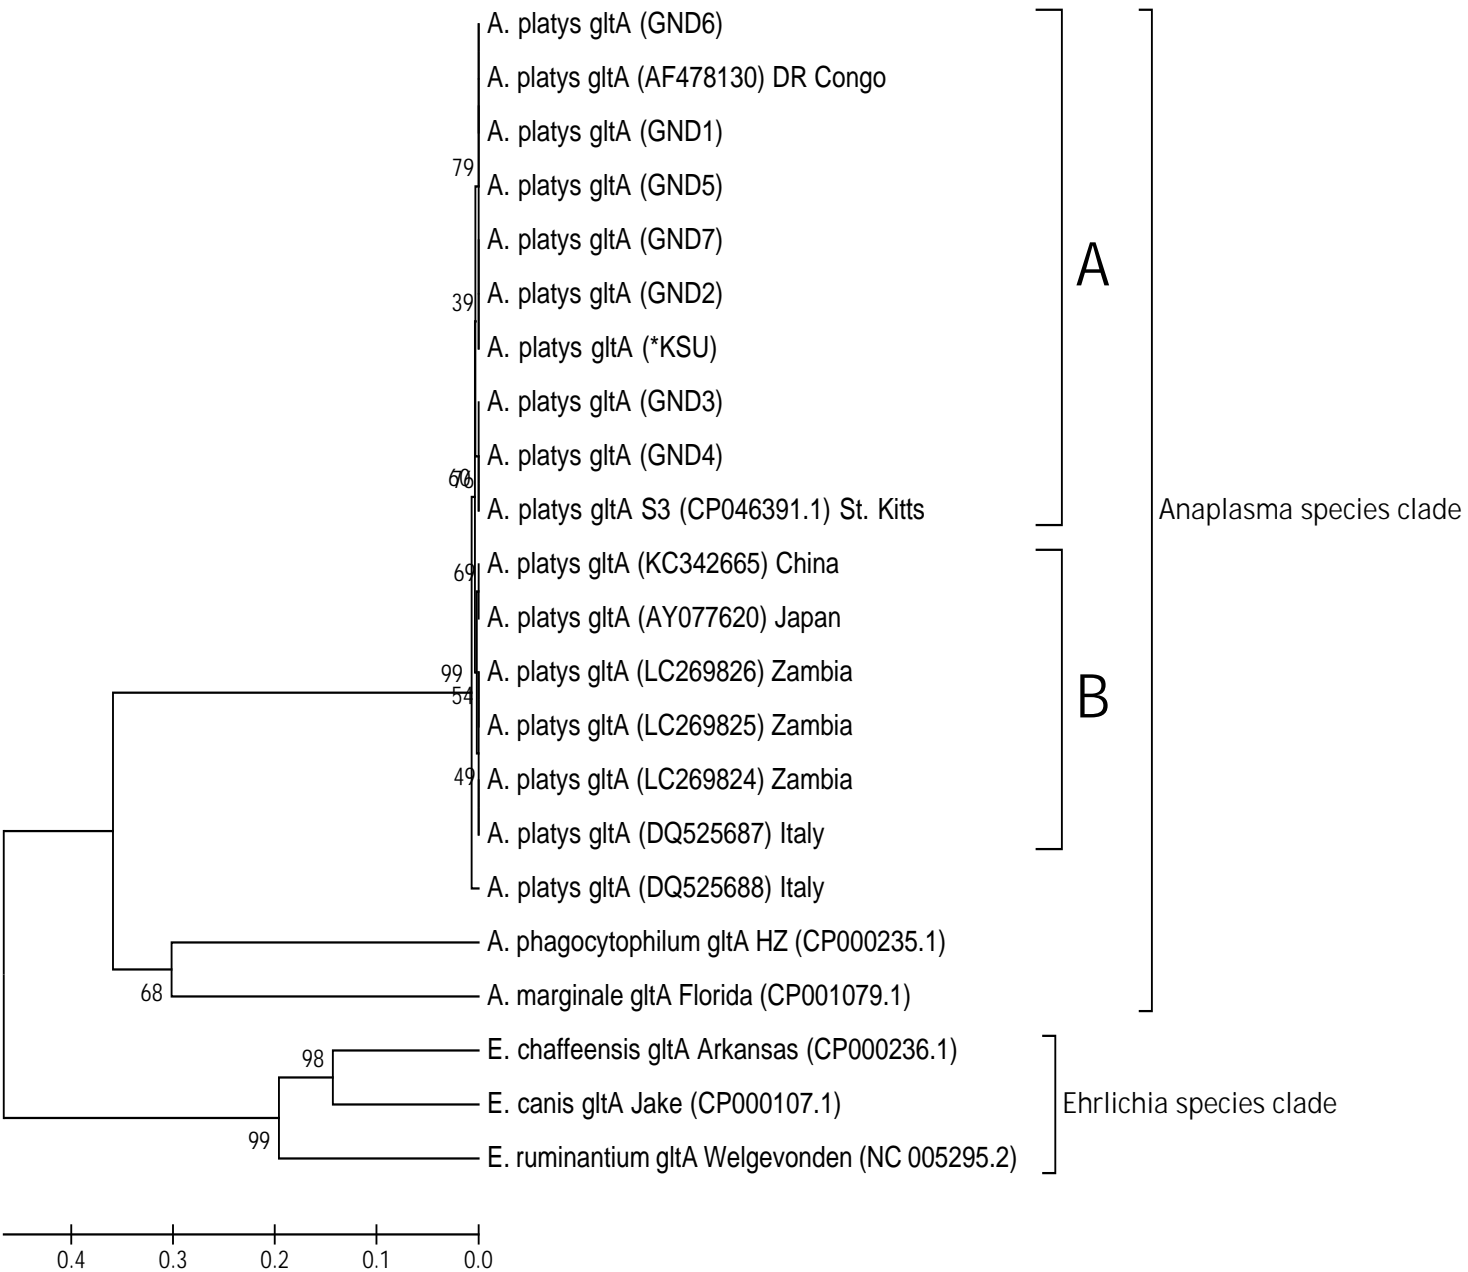

Supplement: NIHMS1704376-supplement-Suppl__Fig_3b_-_A__platys_gltA_UPGMA_Tree.pdf [file NIHMS1704376-supplement-Suppl__Fig_3b_-_A__platys_gltA_UPGMA_Tree.pdf]

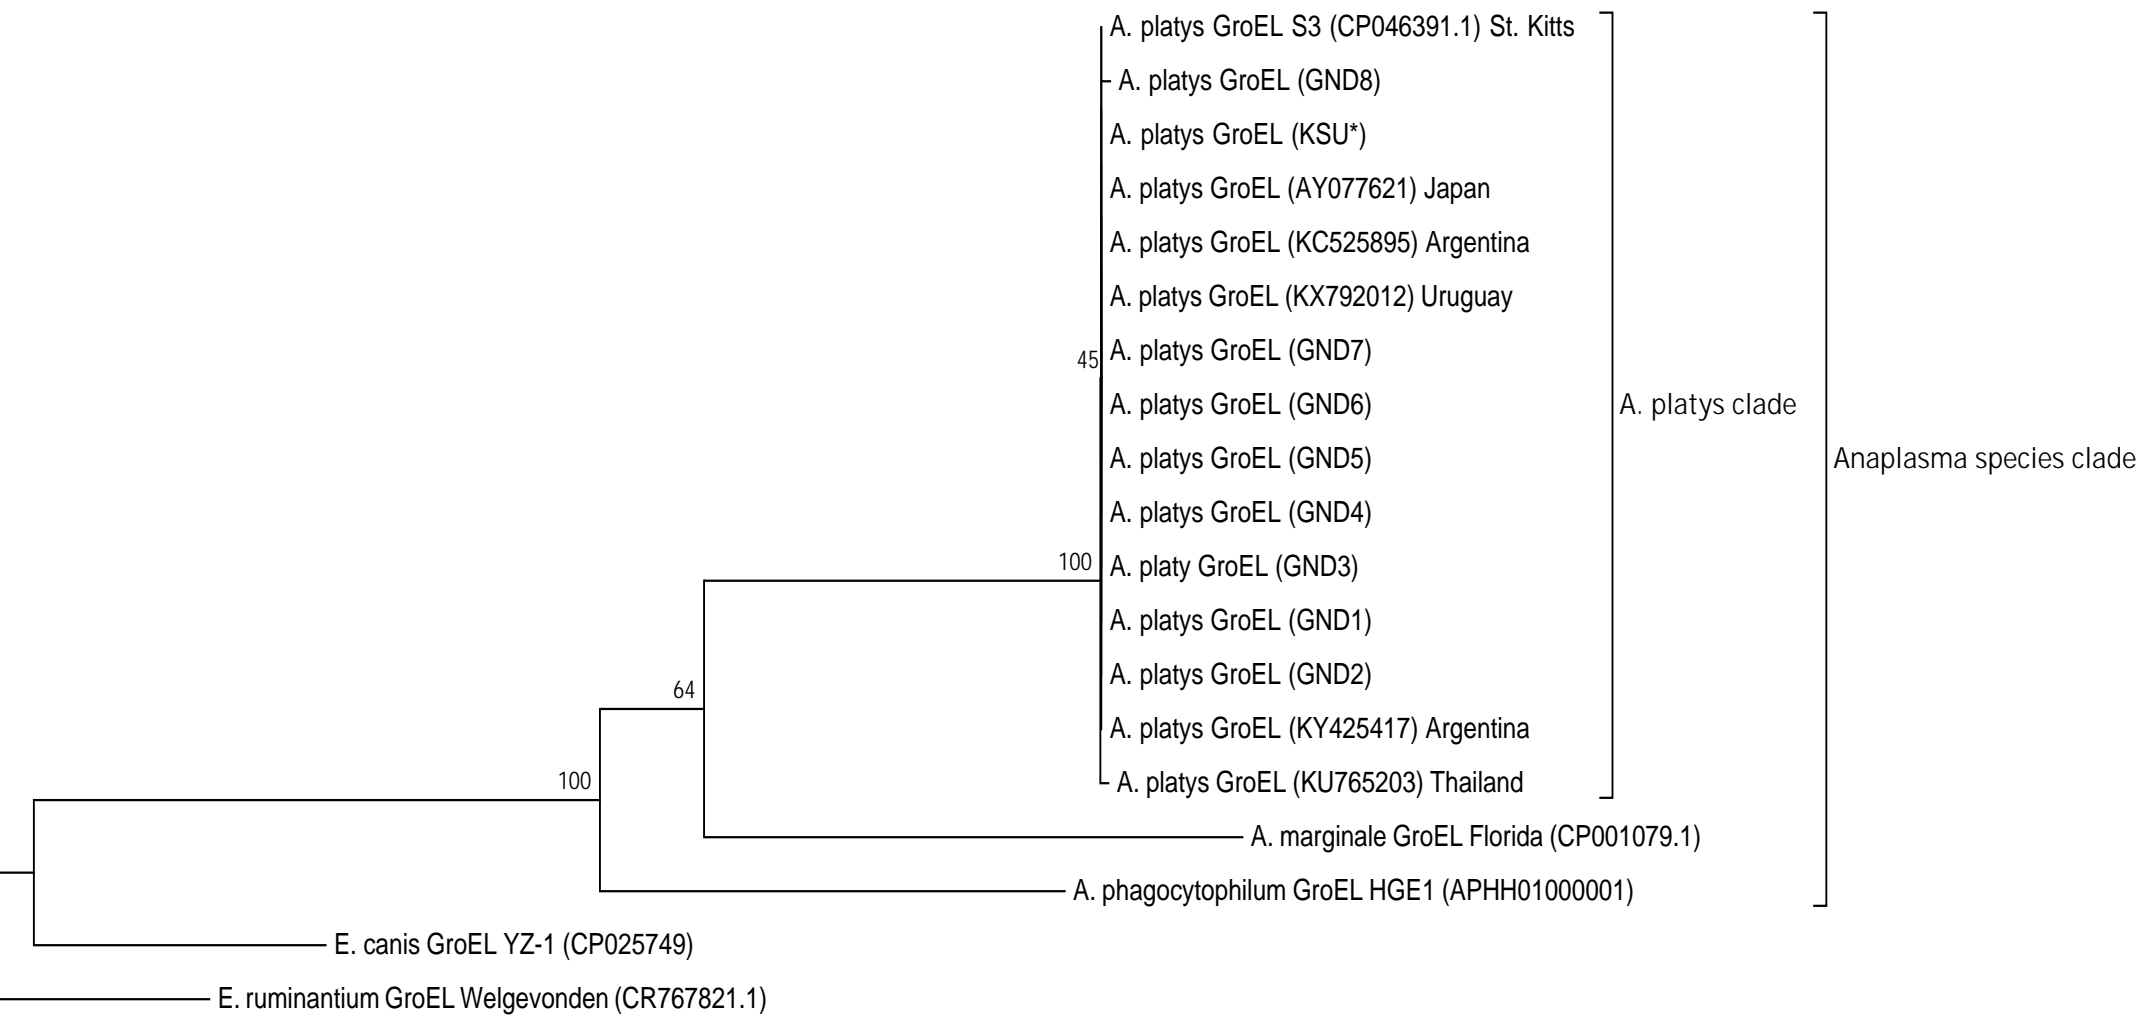

0.05

Supplement: NIHMS1704376-supplement-Suppl__Fig_4a_-_A__platys_groEL_NJ_Tree.pdf [file NIHMS1704376-supplement-Suppl__Fig_4a_-_A__platys_groEL_NJ_Tree.pdf]

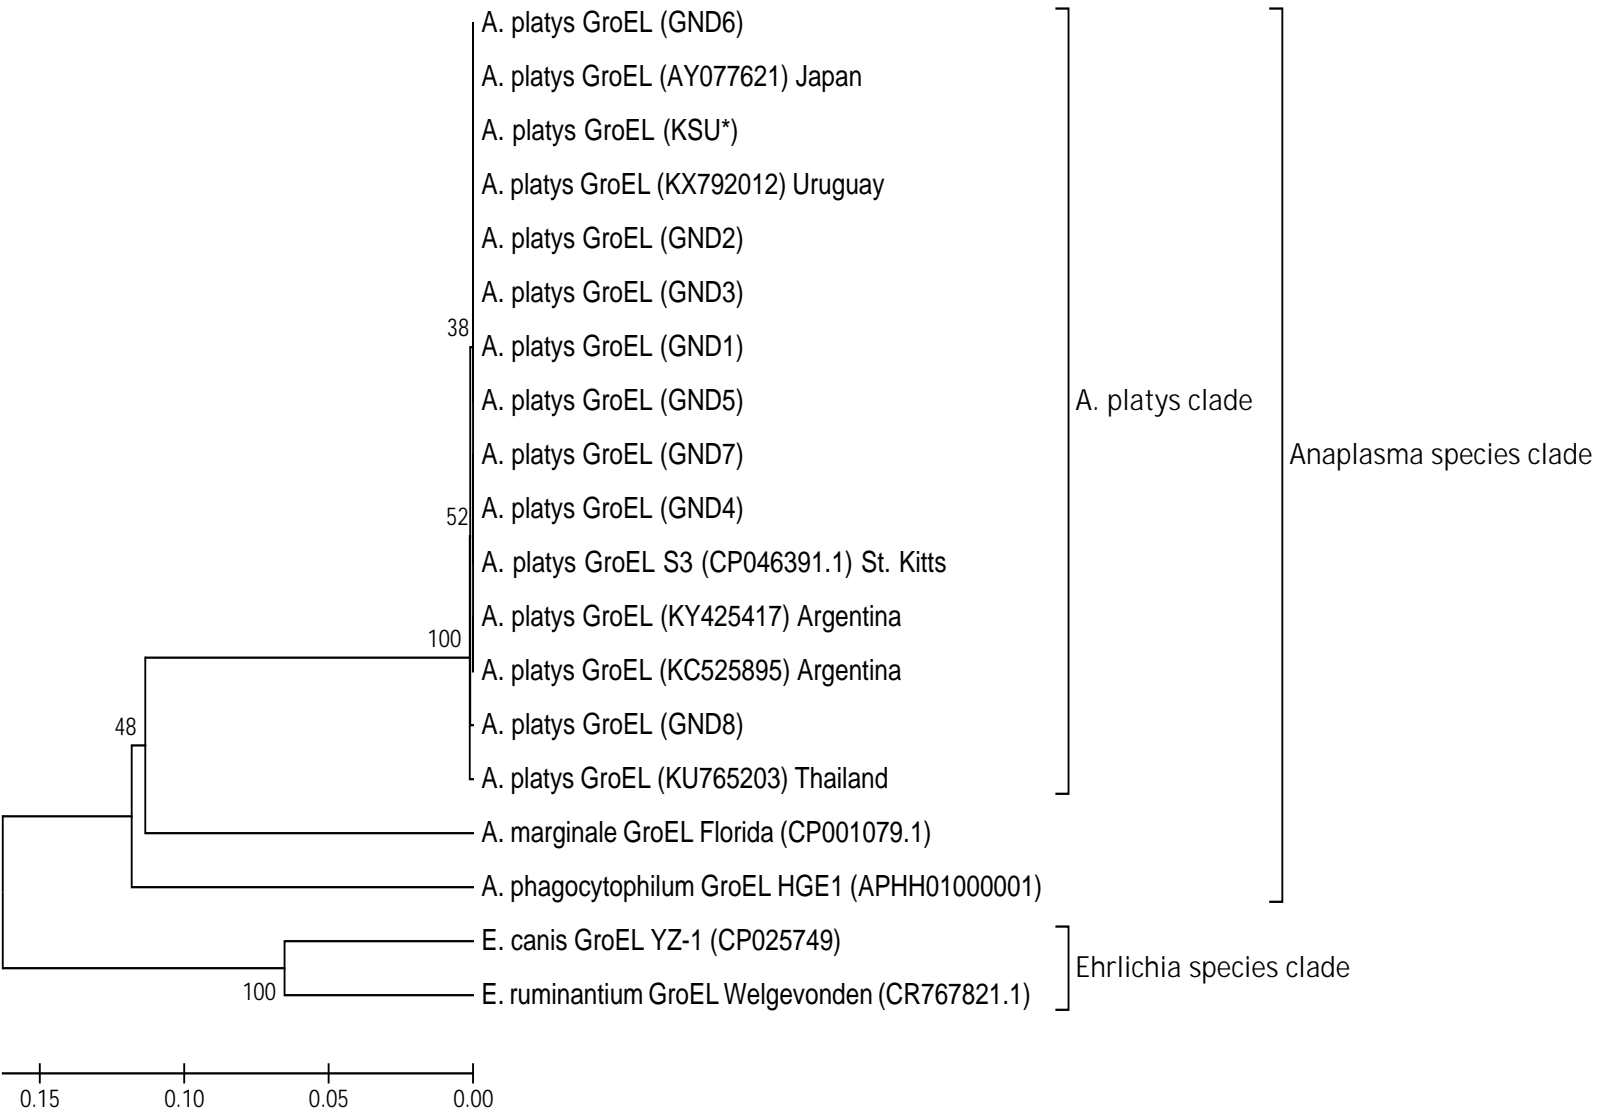

Supplement: NIHMS1704376-supplement-Suppl__Fig_4b_-_A__platys_groEL_UPGMA_Tree.pdf [file NIHMS1704376-supplement-Suppl__Fig_4b_-_A__platys_groEL_UPGMA_Tree.pdf]
